# Supplementary material for: MOF-derived CeO2 catalysts with Pr doping: engineering oxygen vacancies for improved CO2 conversion to dimethyl carbonate
Source: Royal Society of Chemistry journal article supplement (doi:10.1039/d4ta05554c), 2024-01-01
Supplement: d4ta05554c1.pdf [file d4ta05554c1.pdf]

## **Supplementary Material**

### **MOF-derived CeO<sub>2</sub> Catalysts with Pr Doping: Engineering Oxygen Vacancies for Improved CO<sub>2</sub> conversion to Dimethyl Carbonate**

Jungseob So<sup>a,1</sup>, Min Hye Jeong<sup>b,1</sup>, Jungwon Yun<sup>c,1</sup>, Byeong-Seon An<sup>d</sup>, Seung-ik Kim<sup>a</sup>, Geun-yeong Kim<sup>a</sup>, Hyun-Tak Kim<sup>a</sup>, Tae Sun Chang<sup>a</sup>, Jin Hee Lee<sup>a</sup>, Iljeong Heo<sup>a</sup>, Jinjoo An<sup>e</sup>, Young Woo You<sup>a,\*</sup>, Minkyu Kim<sup>f,\*</sup>, Young Jin Kim<sup>g,\*</sup>

<sup>a</sup>*CO<sub>2</sub> & Energy Research Center, Korea Research Institute of Chemical Technology (KRICT), Daejeon 34141, Republic of Korea*

<sup>b</sup>*Clean Air Research Laboratory, Korea Institute of Energy Research (KIER), 152 Gajeong-ro, Daejeon 34129, Republic of Korea*

<sup>c</sup>*William G. Lowrie Chemical & Biomolecular Engineering, The Ohio State University, Ohio 43210, United States*

<sup>d</sup>*Analysis Center for Energy Research, Korea Institute of Energy Research (KIER), 152 Gajeong-ro, Daejeon 34129, Republic of Korea*

<sup>e</sup>*Chemical Process Solution Research Center, Korea Research Institute of Chemical Technology (KRICT), Daejeon 34141, Republic of Korea*

<sup>f</sup>*School of Chemical Engineering, Yeungnam University, 280 Daehak-ro, Gyeongsan 38541, Republic of Korea*

<sup>g</sup>*Department of Environmental Engineering, Kyungpook National University, 80 Daehak-ro, Daegu 41566, Republic of Korea*

<sup>1</sup> These authors contributed equally to this work.

\* Corresponding author.

E-mail address: [ywyou@kRICT.re.kr](mailto:ywyou@kRICT.re.kr) (Y.W. You), [mk\\_kim@ynu.ac.kr](mailto:mk_kim@ynu.ac.kr) (M. Kim), [yjkim03@knu.ac.kr](mailto:yjkim03@knu.ac.kr) (Y.J. Kim)

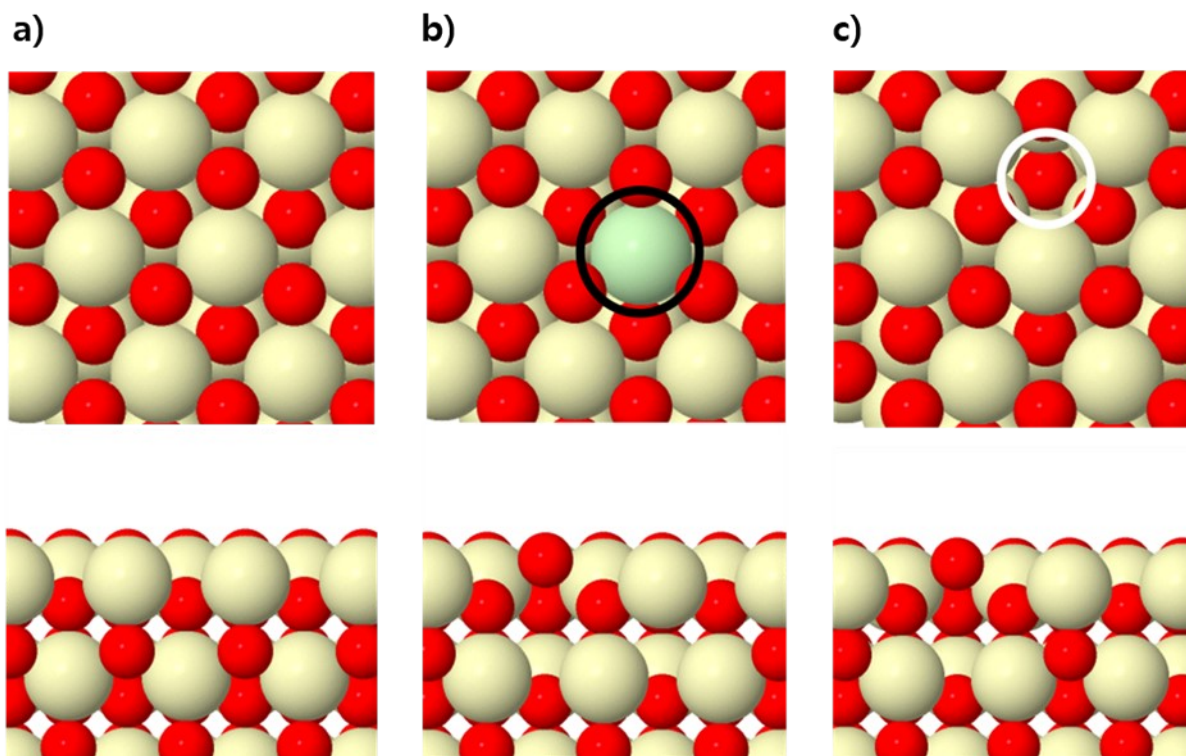

**Fig. S1.** Top and side views of the **a)** Pristine  $\text{CeO}_2$  (111), **b)** Pr substituted  $\text{CeO}_2$  (111) (Pr atom indicated with black solid line), and **c)**  $\text{CeO}_2$  (111) with 1  $\text{O}_v$  surfaces ( $\text{O}_v$  indicated with white solid line).

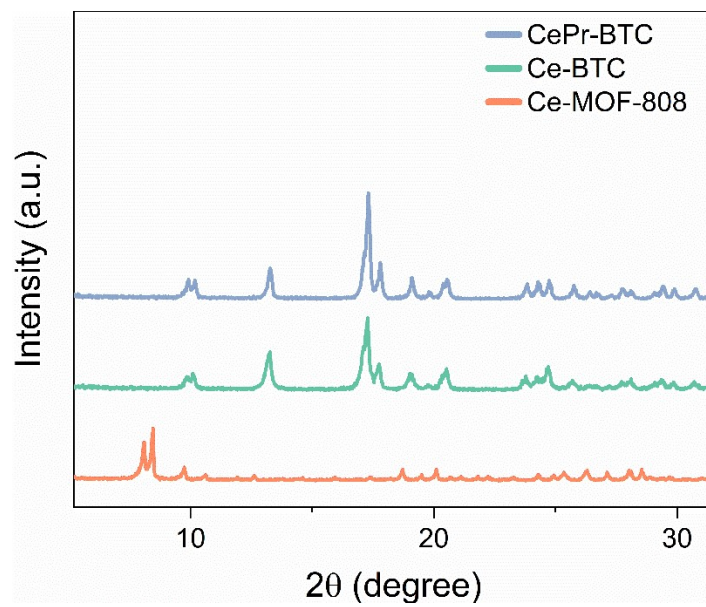

**Fig. S2.** X-ray diffraction (XRD) patterns of a series of sacrificial Ce-MOF templates.

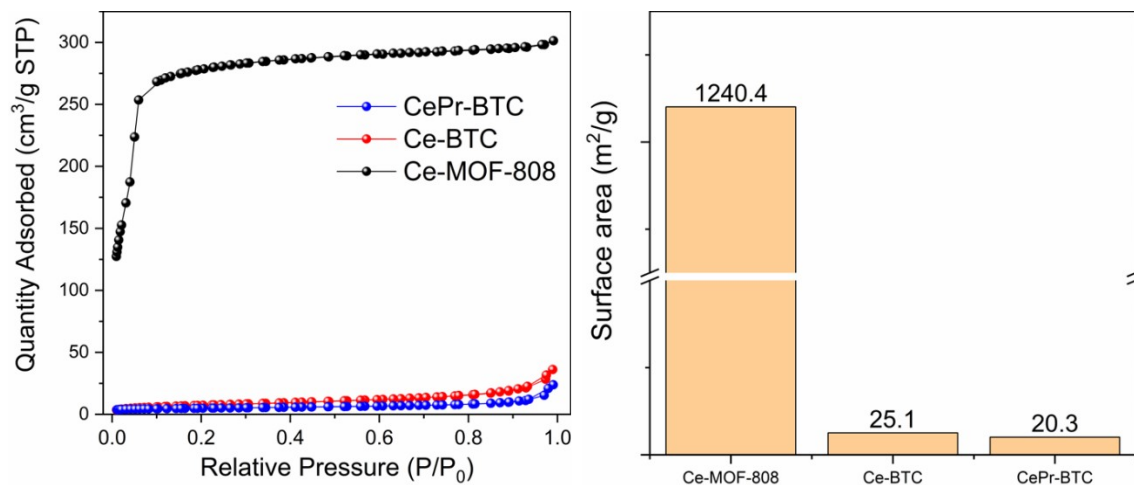

**Fig. S3.** Nitrogen adsorption-desorption isotherms and the corresponding BET surface area of a series of sacrificial Ce-MOF templates.

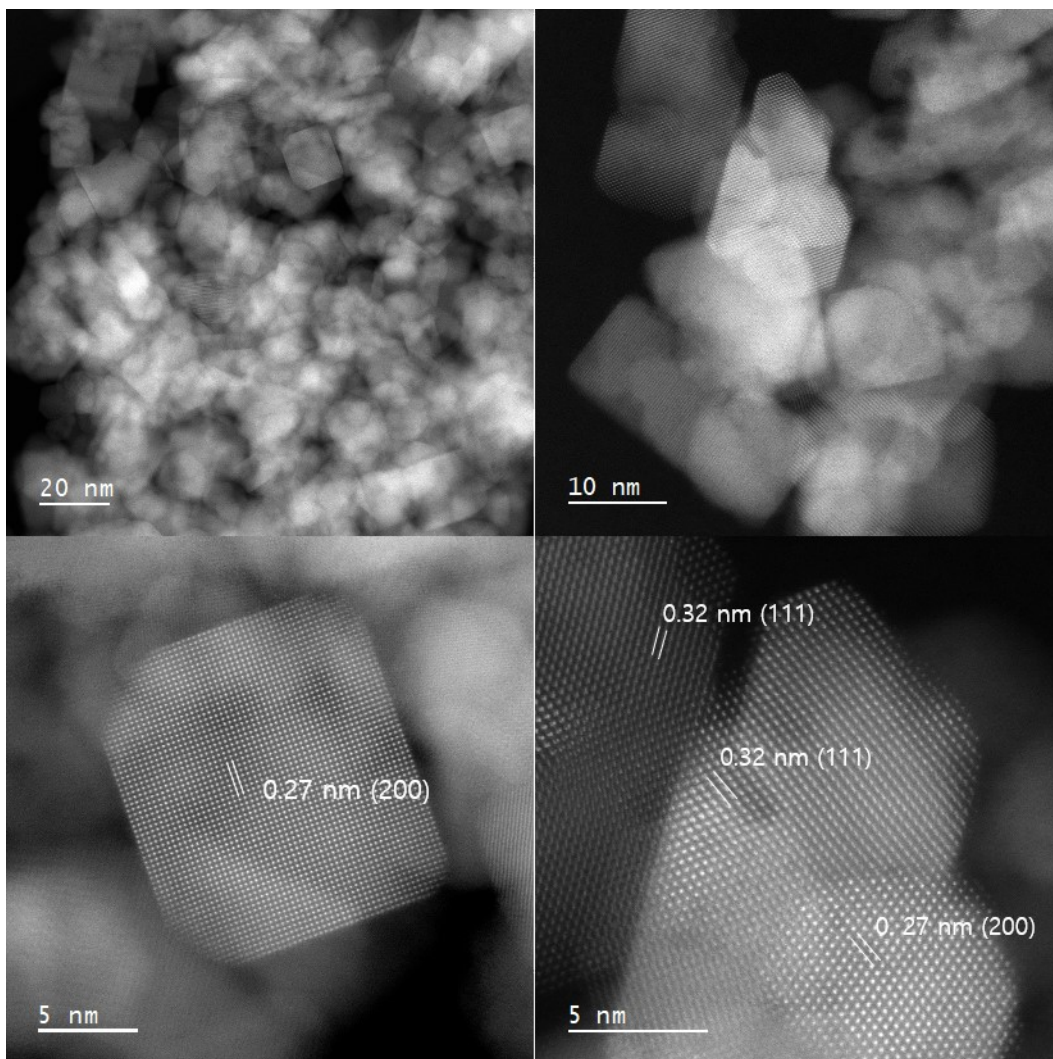

**Fig. S4.** HAADF-HRSTEM images of CeO<sub>2</sub> (P).

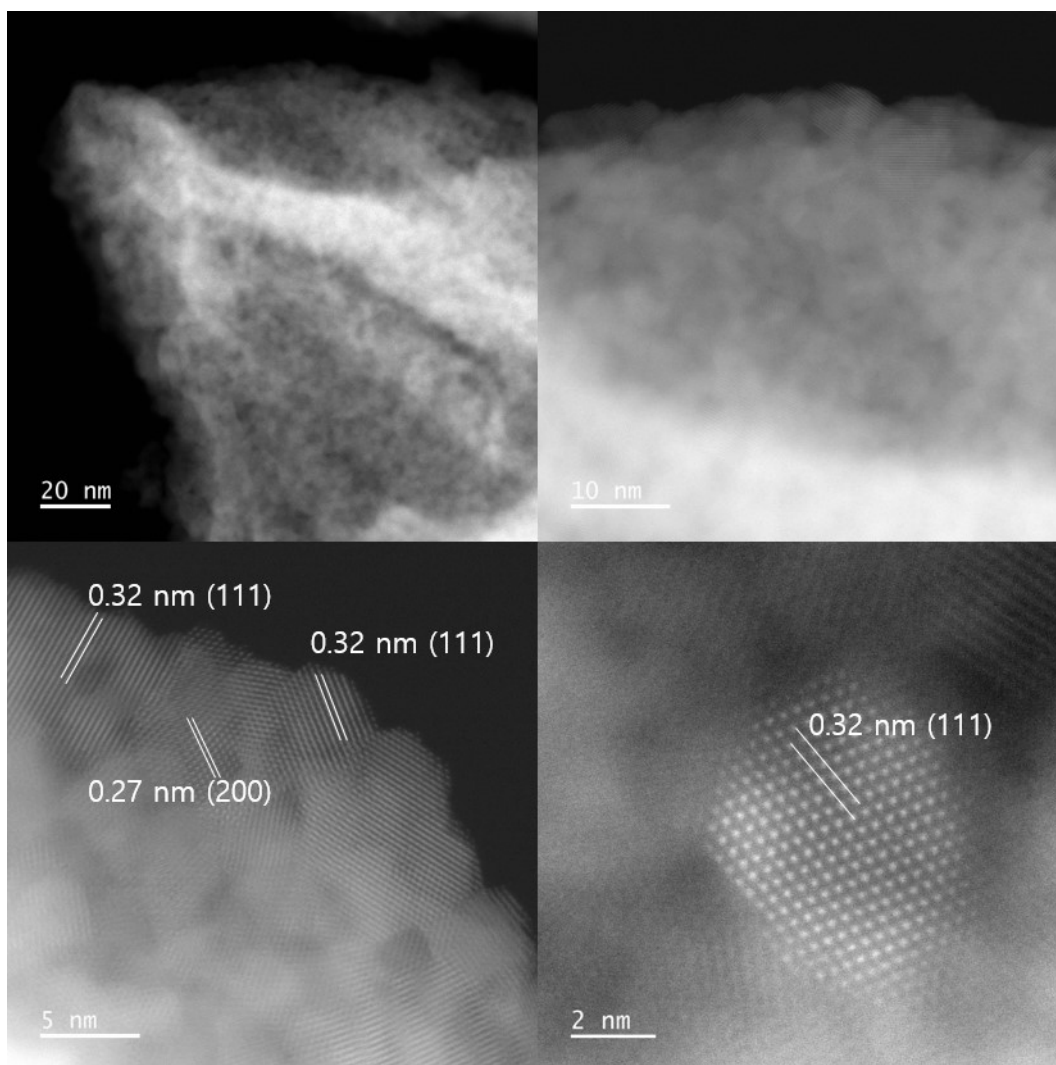

**Fig. S5.** HAADF-HRSTEM images of CeO<sub>2</sub> (808).

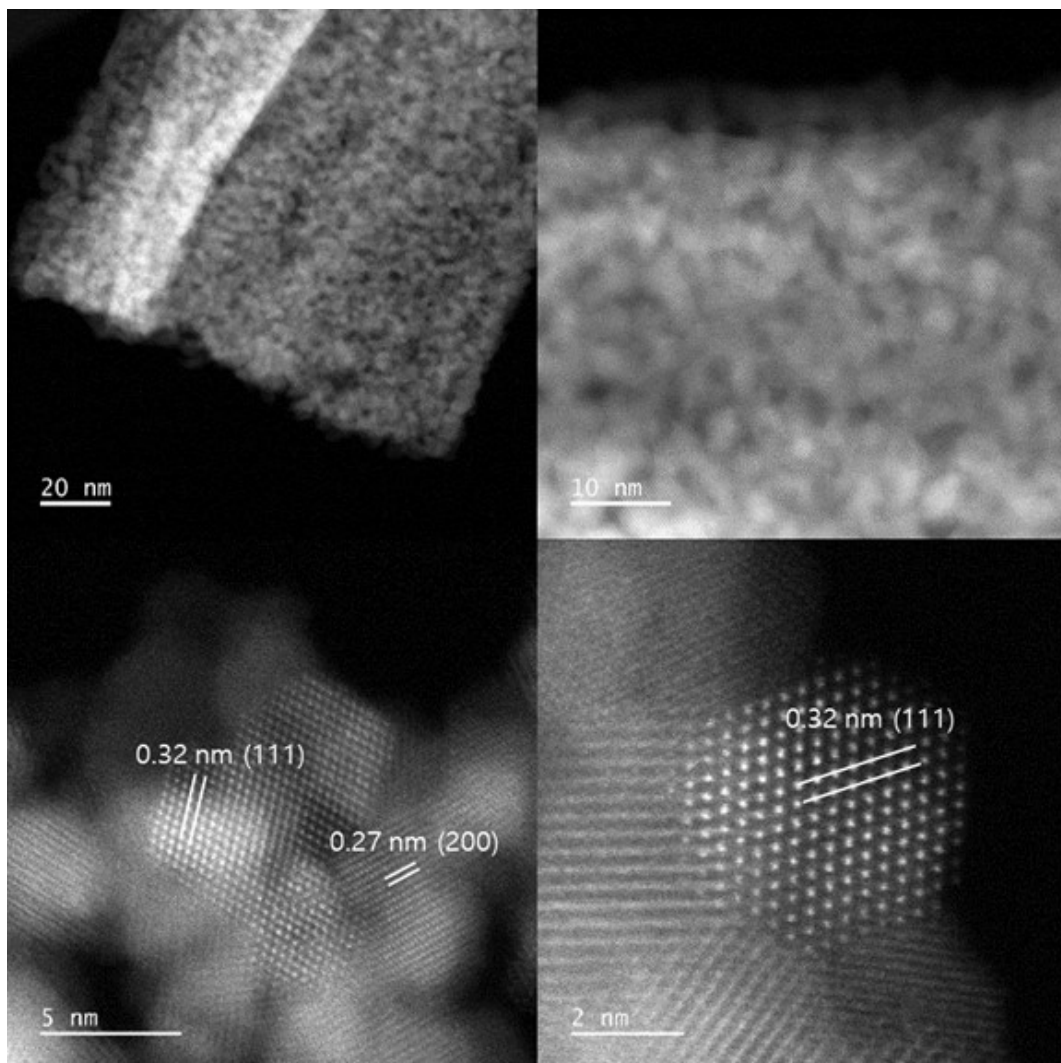

**Fig. S6.** HAADF-HRSTEM images of CeO<sub>2</sub> (BTC).



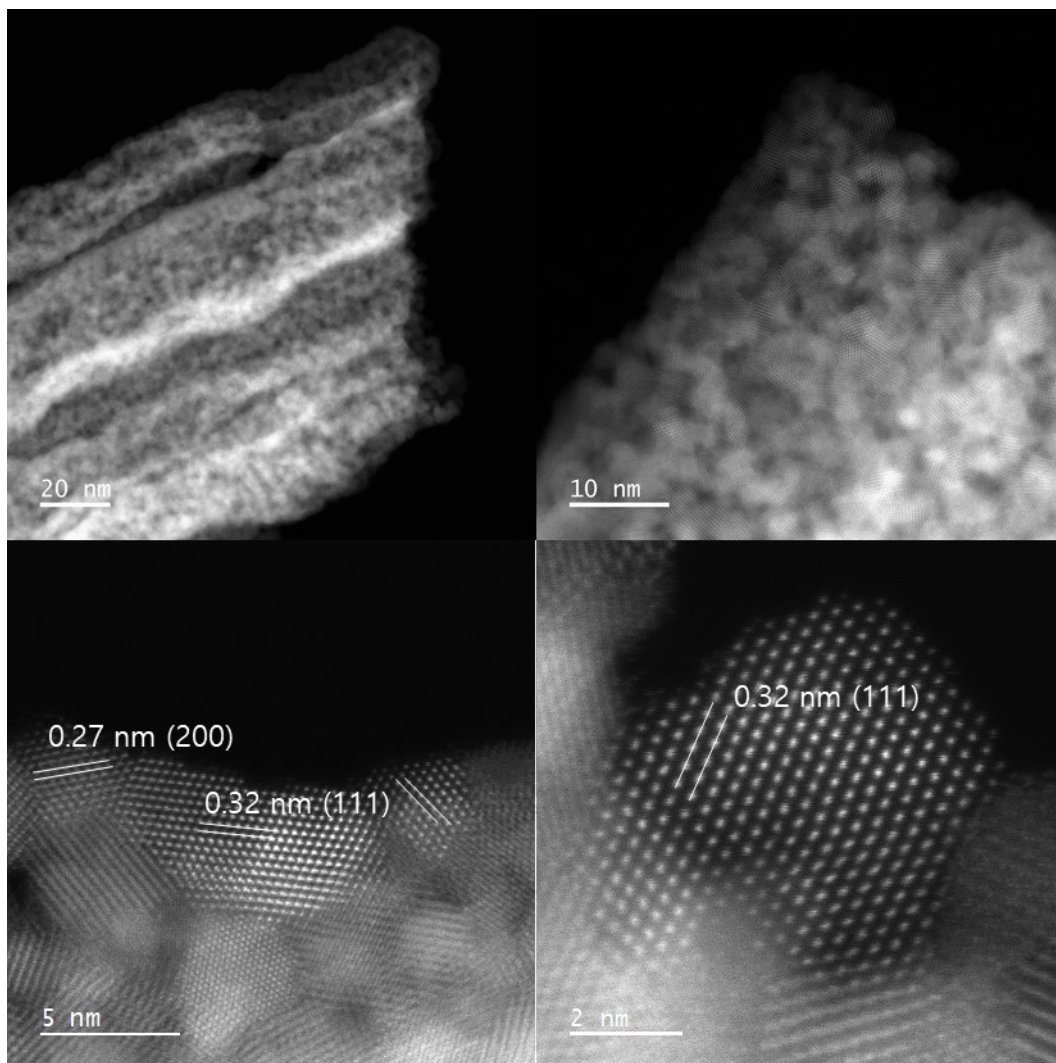

**Fig. S7.** HAADF-HRSTEM images of CePrOx (BTC).



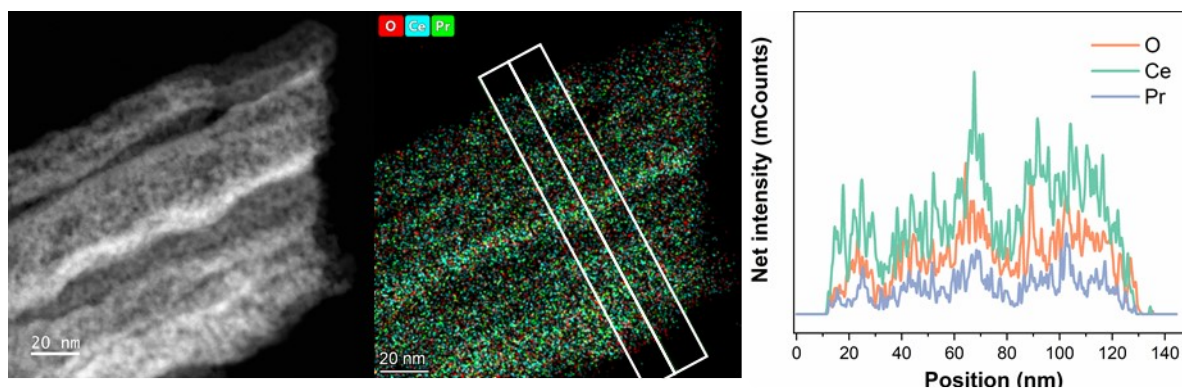

**Fig. S8.** HAADF-STEM image, the EDX, and the corresponding line profile analysis of CePrO<sub>x</sub> (BTC).

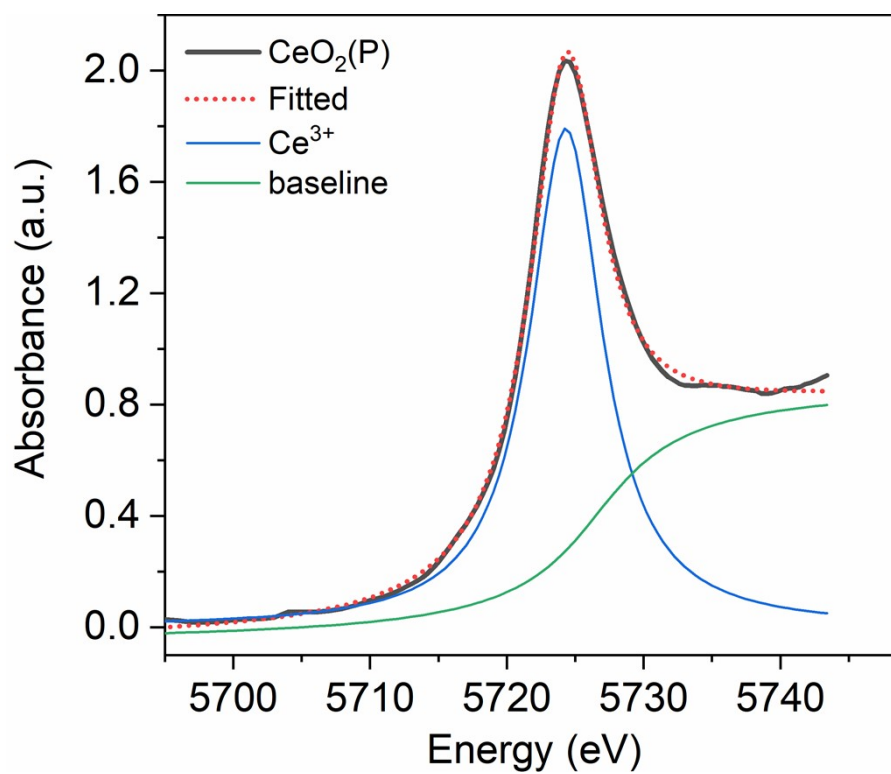

**Fig. S9.** Ce  $L_{III}$  edge XANES spectra of cerium nitrate ( $Ce^{3+}$ ).

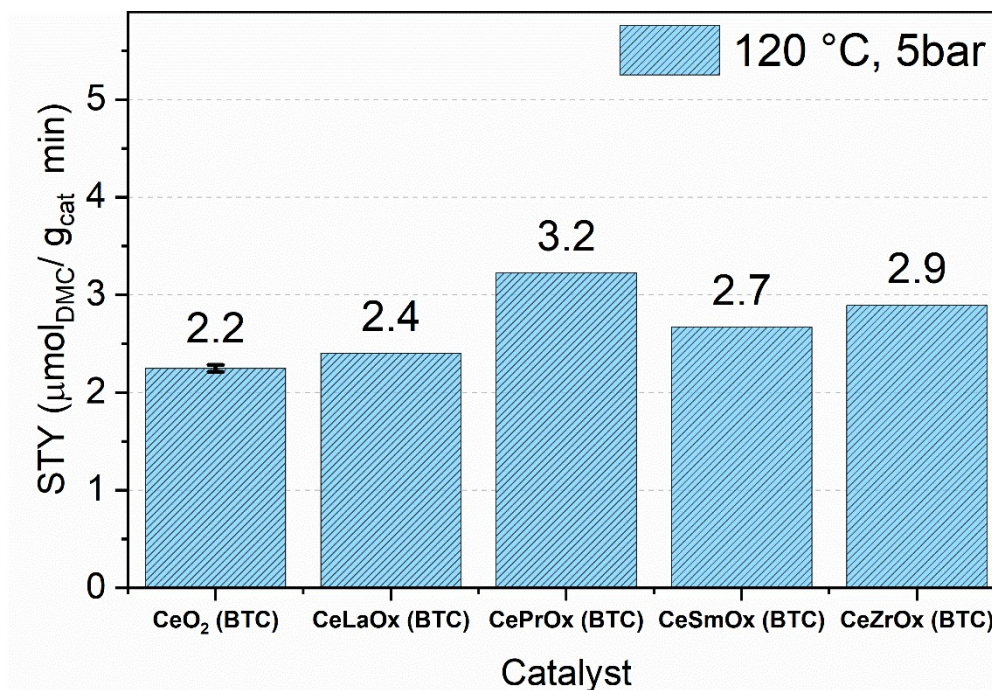

**Fig. S10.** The effect of doping materials on the catalytic performance of MOF-derived ceria in the DMC synthesis from CO<sub>2</sub> and MeOH at 5 bars. Conditions: a methanol flow rate of 18 μl/min and a CO<sub>2</sub> flow rate of 50 sccm, with performance measurements taken 100 minutes after initiating the reaction.

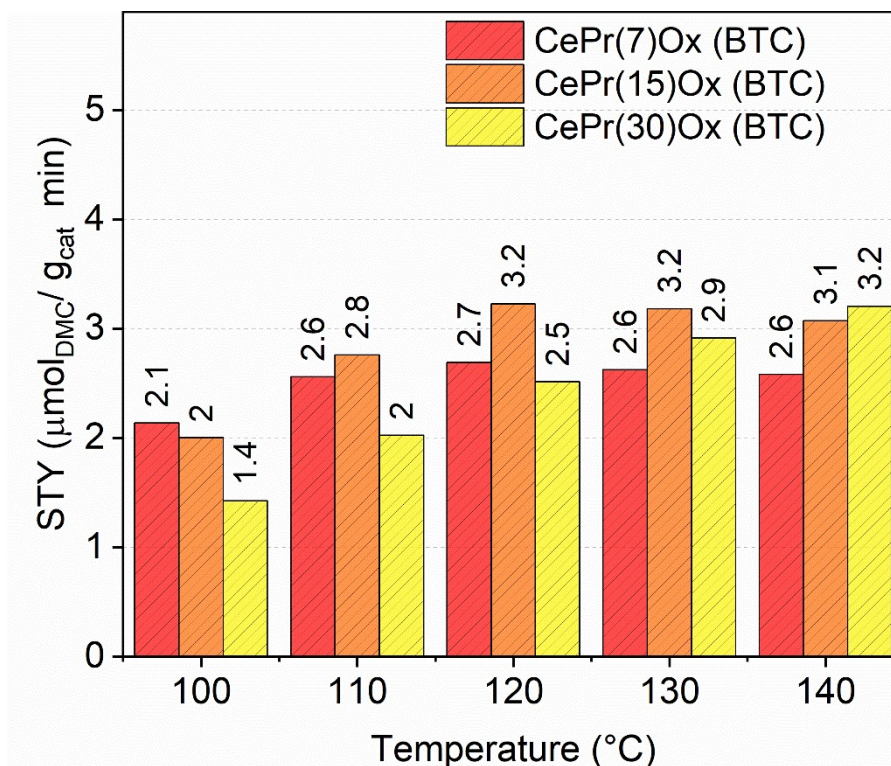

**Fig. S11.** The effect of Pr content on the catalytic performance of CePr(x)Ox (BTC) samples (x = weight percentage of Pr in the mixed oxides) in the DMC synthesis from CO<sub>2</sub> and MeOH at 5 bars. Conditions: a methanol flow rate of 18 μl/min and a CO<sub>2</sub> flow rate of 50 sccm, with performance measurements taken 100 minutes after initiating the reaction.

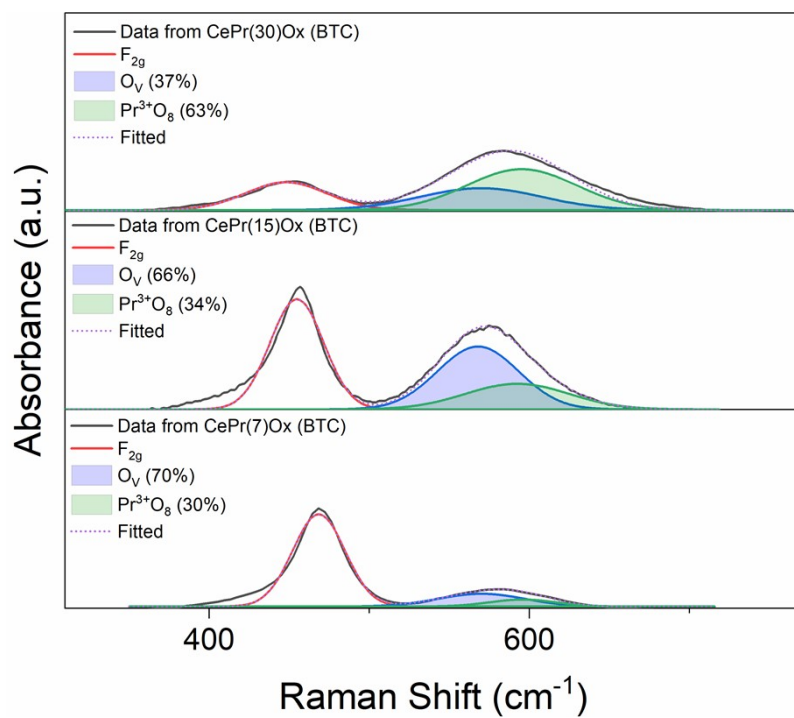

**Fig. S12.** Raman spectra of CePr(x)Ox (BTC) ( $x$  = weight percentage of Pr in the mixed oxides) samples with fitted curves.

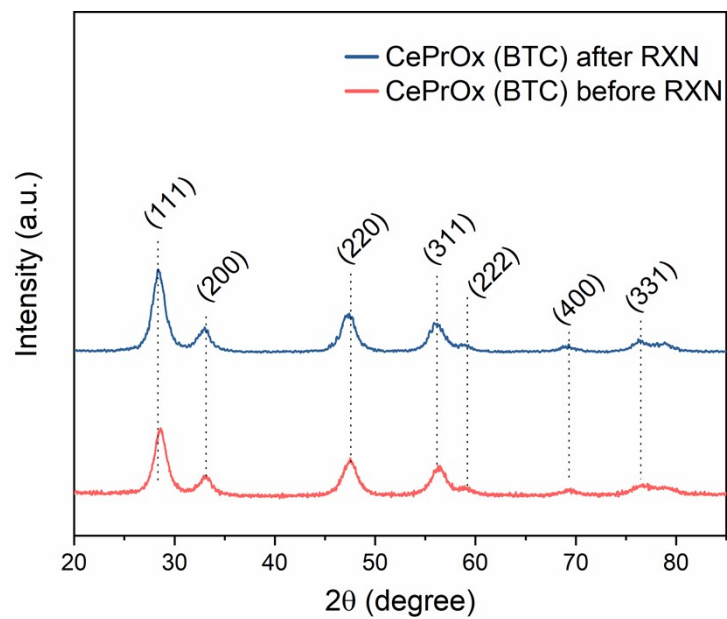

**Fig. S13.** X-ray diffraction (XRD) patterns of CePrOx (BTC) before and after the reaction. Reaction conditions: methanol flow rate of 18  $\mu\text{L}/\text{min}$  and  $\text{CO}_2$  flow rate of 50 sccm, conducted at 10 bar and 120  $^\circ\text{C}$ .

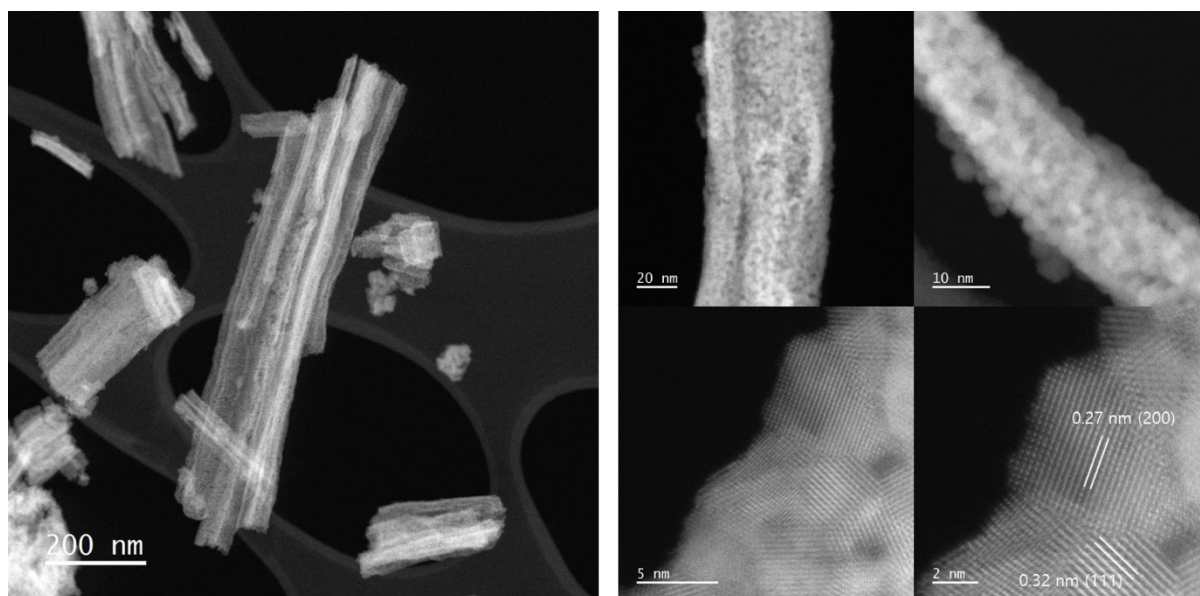

**Fig. S14.** HAADF-STEM images of CePrOx (BTC) after reaction. Reaction conditions: methanol flow rate of 18  $\mu\text{L}/\text{min}$  and  $\text{CO}_2$  flow rate of 50 sccm, conducted at 10 bar and 120  $^\circ\text{C}$ .



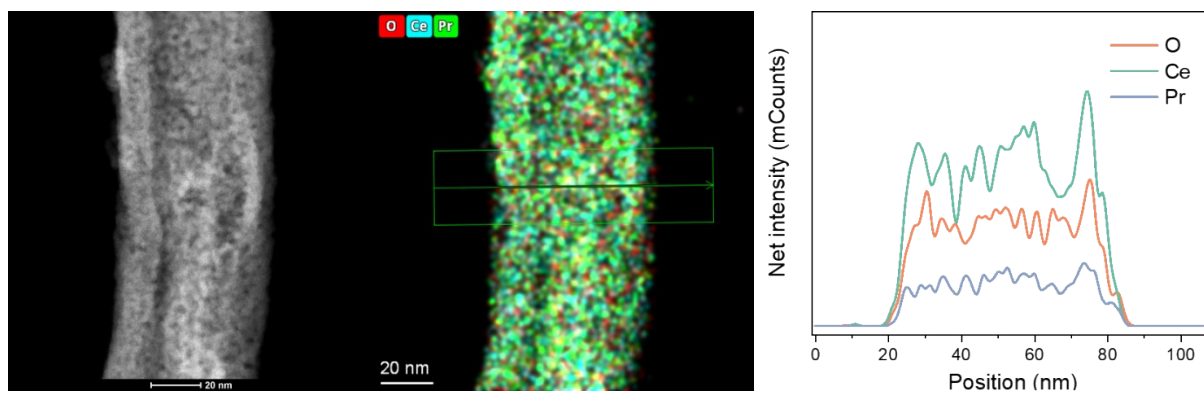

**Fig. S15.** HAADF-STEM image, the EDX, and the corresponding line profile analysis of CePrOx (BTC) after reaction. Reaction conditions: methanol flow rate of 18  $\mu\text{L}/\text{min}$  and  $\text{CO}_2$  flow rate of 50 sccm, conducted at 10 bar and 120  $^\circ\text{C}$ .

### **Favored Configurations of CO<sub>2</sub>, CH<sub>3</sub>OH and DMC on CeO<sub>2</sub>(111)**

We investigate the favored configurations with corresponding adsorption energies of CO<sub>2</sub>, CH<sub>3</sub>OH and CH<sub>3</sub>OCOOCH<sub>3</sub> (DMC) on pristine CeO<sub>2</sub>(111), Pr-substituted CeO<sub>2</sub> (111), O<sub>v</sub>-CeO<sub>2</sub> (111) and Pr&O<sub>v</sub> CeO<sub>2</sub> (111) surfaces shown in the figure S9-11. The adsorption energy of CO<sub>2</sub> exhibits similar values across all surfaces, with the strongest adsorption observed on the O<sub>v</sub>-CeO<sub>2</sub> (111) surface (~ 38.7 kJ/mol) and the weakest on the Pr-substituted CeO<sub>2</sub> (111) surface (~ 29.2 kJ/mol). For CH<sub>3</sub>OH, we observe relatively weak adsorption on both the pristine and Pr-substituted CeO<sub>2</sub> (111) surfaces, with binding energies of approximately 69 kJ/mol, whereas stronger adsorption is observed on surfaces containing oxygen vacancies (O<sub>v</sub>-CeO<sub>2</sub> (111) and Pr&O<sub>v</sub>-CeO<sub>2</sub> (111)), with binding energies of approximately 99 kJ/mol. Upon formation of DMC, a similar trend is observed to that of CH<sub>3</sub>OH, with relatively weak binding energies observed on both the pristine and Pr-substituted surfaces, and strong binding energies observed on Pr&O<sub>v</sub>-CeO<sub>2</sub> (111).

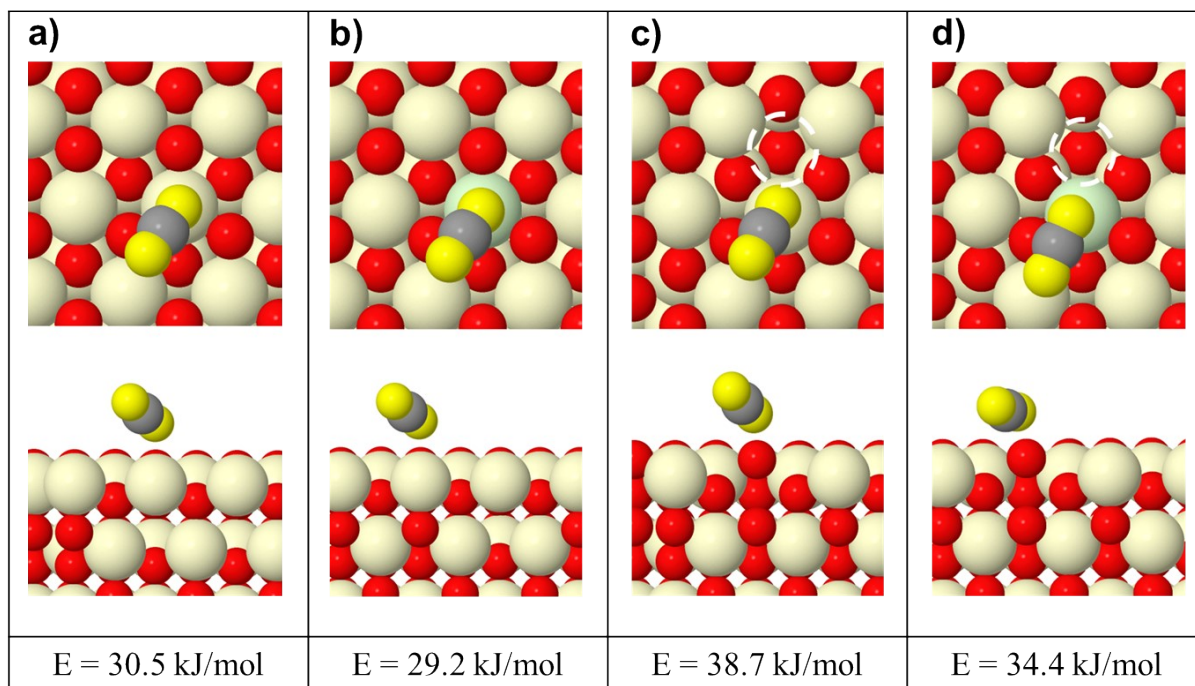

**Fig. S16.** DFT predicted favored configurations of CO<sub>2</sub> on **a)** CeO<sub>2</sub> (111) **b)** Pr-CeO<sub>2</sub> (111) surface **c)** O<sub>V</sub>-CeO<sub>2</sub> (111) surface and, **d)** Pr&O<sub>V</sub>-CeO<sub>2</sub> (111). The corresponding adsorption energies are provided the below figures. The oxygen atom bonding with carbon is colored yellow and the oxygen vacancy site is dashed and colored white.

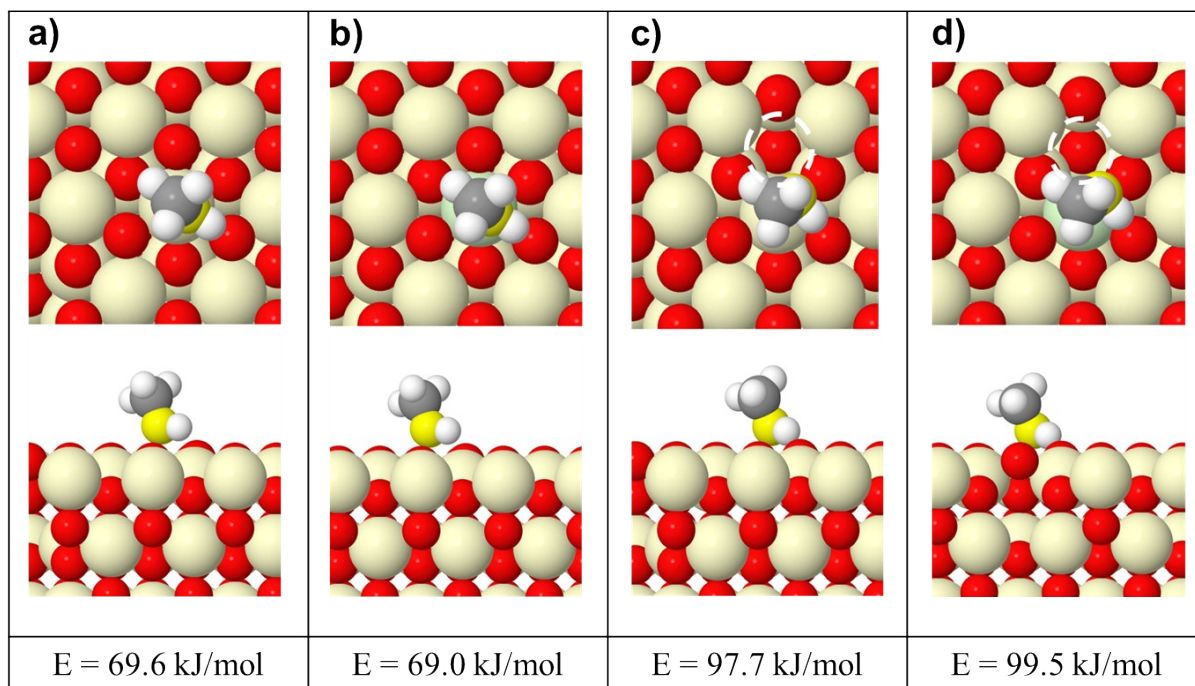

**Fig. S17.** DFT predicted favored configurations of CH<sub>3</sub>OH on **a)** CeO<sub>2</sub> (111) **b)** Pr-CeO<sub>2</sub> (111) surface **c)** O<sub>v</sub>-CeO<sub>2</sub> (111) surface and, **d)** Pr&O<sub>v</sub>-CeO<sub>2</sub> (111). The corresponding adsorption energies are provided the below figures. The oxygen atom bonding with carbon is colored yellow and the oxygen vacancy site is dashed and colored white.

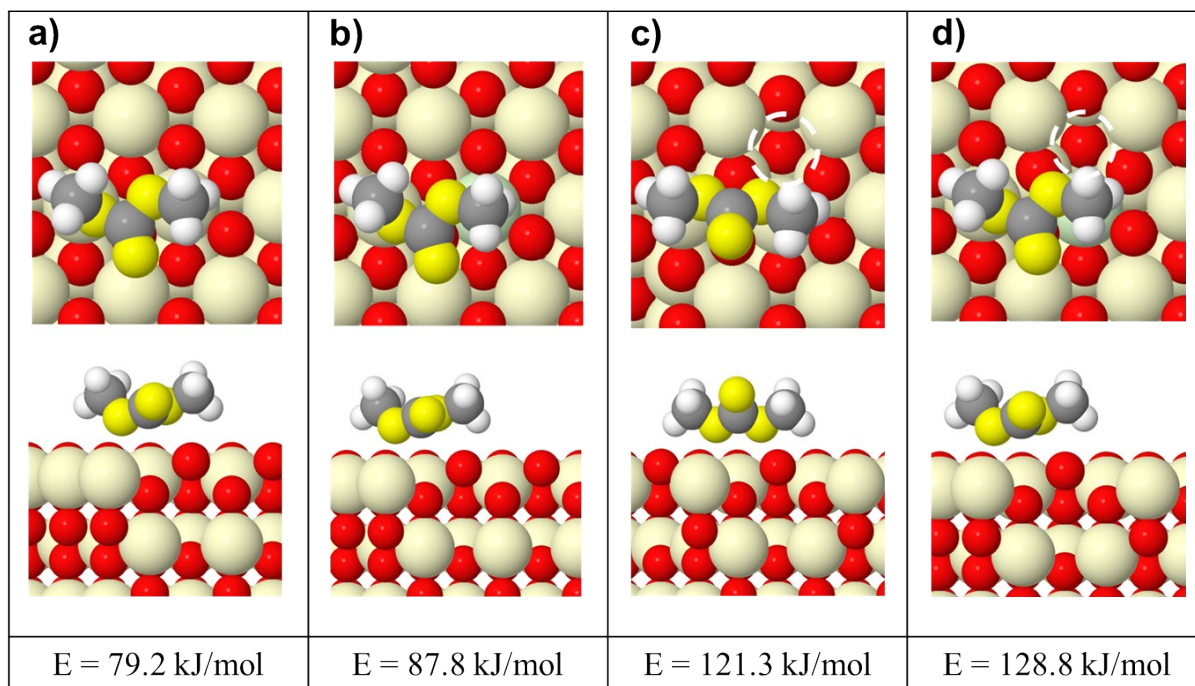

**Fig. S18.** DFT predicted favored configurations of DMC on **a)** CeO<sub>2</sub> (111) **b)** Pr-CeO<sub>2</sub> (111) surface **c)** O<sub>V</sub>-CeO<sub>2</sub> (111) surface and, **d)** Pr&O<sub>V</sub>-CeO<sub>2</sub> (111). The corresponding adsorption energies are provided the below figures. The oxygen atom bonding with carbon is colored yellow and the oxygen vacancy site is dashed and colored white.

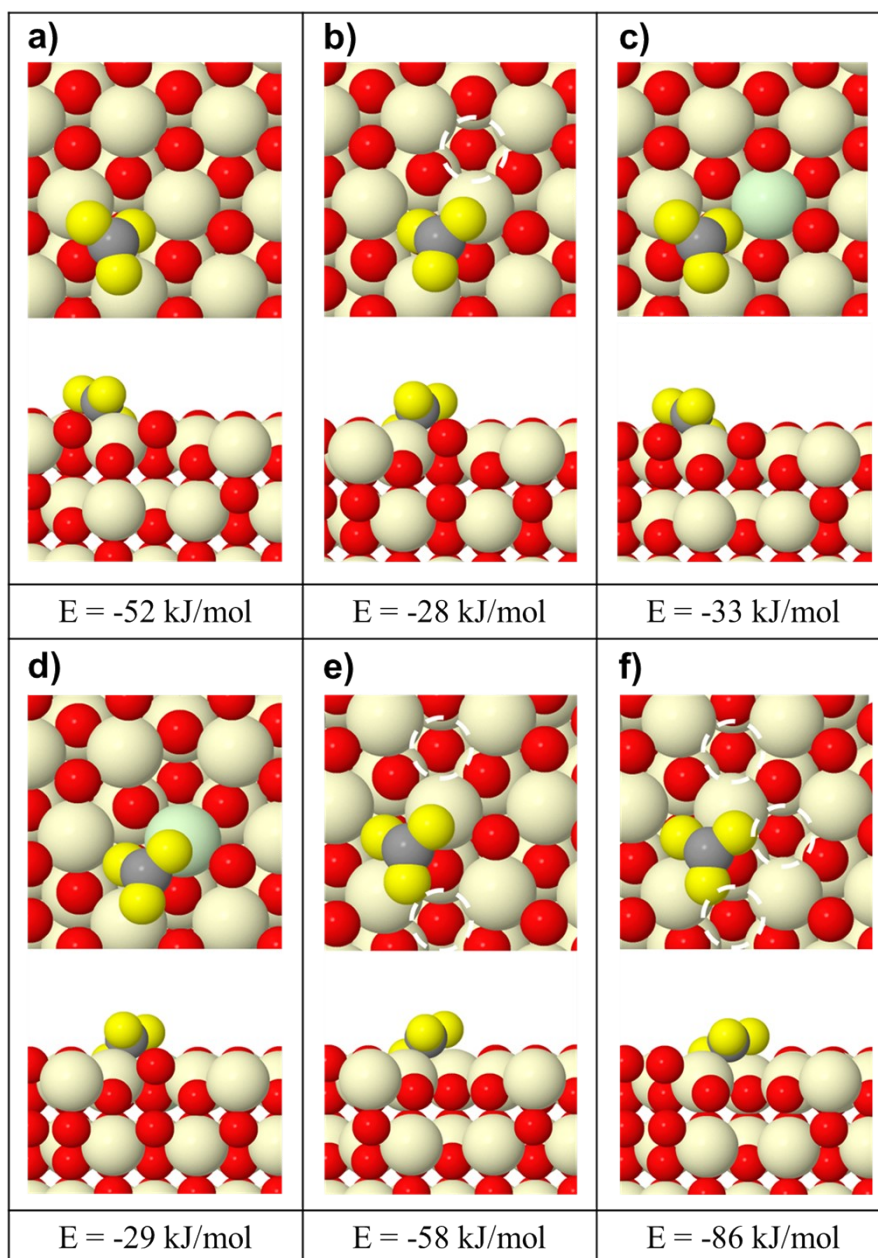

**Fig. S19.**  $\Delta G$  of  $\text{CO}_2$  activation on various  $\text{CeO}_2$  (111) surface (a) pristine  $\text{CeO}_2$ , (b)  $\text{CeO}_2$  w  $\text{O}_v$ , (c) Pr- $\text{CeO}_2$ , (d) Pr- $\text{CeO}_2$  w  $\text{O}_v$ , (e)  $\text{CeO}_2$  w  $2\text{O}_v$  and (f)  $\text{CeO}_2$  w  $3\text{O}_v$ . The oxygen atom bonding with carbon is colored yellow and the oxygen vacancy site is dashed and colored white.

**Table S1.** Weight percentages of Pr and Ce in a series of CePrOx catalysts determined by ICP-OES analysis

| catalysts                     | Pr (wt.%) | Ce (wt.%) | Pr/(Ce+Pr) |
|-------------------------------|-----------|-----------|------------|
| CePr(7)Ox (BTC)               | 7.4       | 73.9      | 0.09       |
| CePr(15)Ox (BTC) <sup>a</sup> | 14.7      | 66.3      | 0.18       |
| CePr(30)Ox (BTC)              | 29.8      | 57.8      | 0.34       |

<sup>a</sup>CePrOx (BTC) in main text corresponds to CePr(15)Ox (BTC)



**Table S2.** Results of XANES peak fitting using Ce  $L_{III}$  edge XANES spectra

| Peak Position<br>(eV)                                       | CeO <sub>2</sub> (P) | CeO <sub>2</sub> (808) | CeO <sub>2</sub> (BTC) | CePrOx<br>(BTC) | Ce(NO <sub>3</sub> ) <sub>3</sub> |
|-------------------------------------------------------------|----------------------|------------------------|------------------------|-----------------|-----------------------------------|
| A: Pre-edge feature                                         | 5718.15              | 5718.24                | 5718.21                | 5718.17         | -                                 |
| B: Ce <sup>3+</sup> , 2p → 4f <sup>1</sup> 5d <sup>1</sup>  | 5724.83              | 5724.53                | 5724.08                | 5724.58         | 5724.31                           |
| C: Ce <sup>4+</sup> , 2p → 4f <sup>0</sup> 5d <sup>1</sup>  | 5728.63              | 5728.82                | 5728.56                | 5728.57         | -                                 |
| D: Ce <sup>4+</sup> , 2p → 4f <sup>1</sup> 5d <sup>1v</sup> | 5736.05              | 5736.07                | 5736.12                | 5736.04         | -                                 |

**Table S3.** Peak position and full width at half maximum (FWHM) for the fitted 5 sets of spin-orbit split doublets of Ce 3d ( $3d_{5/2}$  and  $3d_{3/2}$ ) for CeO<sub>2</sub> (P)

| Peak<br>Assignment | Origin of cerium<br>contribution | Peak decomposition |      |
|--------------------|----------------------------------|--------------------|------|
|                    |                                  | Peak               | FWMH |
| v0                 | Ce <sup>3+</sup>                 | 880.2              | 1.04 |
| u0                 | Ce <sup>3+</sup>                 | 898.4              | 1.04 |
| v                  | Ce <sup>4+</sup>                 | 882.2              | 1.99 |
| u                  | Ce <sup>4+</sup>                 | 900.7              | 1.99 |
| v'                 | Ce <sup>3+</sup>                 | 884.2              | 2.85 |
| u'                 | Ce <sup>3+</sup>                 | 902.9              | 2.85 |
| v''                | Ce <sup>4+</sup>                 | 888.3              | 4.63 |
| u''                | Ce <sup>4+</sup>                 | 907.1              | 4.63 |
| v'''               | Ce <sup>4+</sup>                 | 898.1              | 2.14 |
| u'''               | Ce <sup>4+</sup>                 | 916.5              | 2.14 |

**Table S4.** Peak position and full width at half maximum (FWHM) for the fitted 5 sets of spin-orbit split doublets of Ce 3d ( $3d_{5/2}$  and  $3d_{3/2}$ ) for CeO<sub>2</sub> (808)

| Peak<br>Assignment | Origin of cerium<br>contribution | Peak decomposition |      |
|--------------------|----------------------------------|--------------------|------|
|                    |                                  | Peak               | FWMH |
| v0                 | Ce <sup>3+</sup>                 | 880.1              | 1.60 |
| u0                 | Ce <sup>3+</sup>                 | 898.5              | 1.60 |
| v                  | Ce <sup>4+</sup>                 | 882.0              | 1.77 |
| u                  | Ce <sup>4+</sup>                 | 900.5              | 1.77 |
| v'                 | Ce <sup>3+</sup>                 | 884.4              | 3.0  |
| u'                 | Ce <sup>3+</sup>                 | 902.9              | 3.0  |
| v''                | Ce <sup>4+</sup>                 | 888.2              | 4.35 |
| u''                | Ce <sup>4+</sup>                 | 906.7              | 3.14 |
| v'''               | Ce <sup>4+</sup>                 | 897.9              | 1.98 |
| u'''               | Ce <sup>4+</sup>                 | 916.2              | 1.87 |

**Table S5.** Peak position and full width at half maximum (FWHM) for the fitted 5 sets of spin-orbit split doublets of Ce 3d ( $3d_{5/2}$  and  $3d_{3/2}$ ) for CeO<sub>2</sub> (BTC)

| Peak<br>Assignment | Origin of cerium<br>contribution | Peak decomposition |      |
|--------------------|----------------------------------|--------------------|------|
|                    |                                  | Peak               | FWMH |
| v0                 | Ce <sup>3+</sup>                 | 880.2              | 1.35 |
| u0                 | Ce <sup>3+</sup>                 | 898.5              | 1.35 |
| v                  | Ce <sup>4+</sup>                 | 882.1              | 1.78 |
| u                  | Ce <sup>4+</sup>                 | 900.6              | 1.78 |
| v'                 | Ce <sup>3+</sup>                 | 884.4              | 3.8  |
| u'                 | Ce <sup>3+</sup>                 | 902.7              | 3.8  |
| v''                | Ce <sup>4+</sup>                 | 888.6              | 3.74 |
| u''                | Ce <sup>4+</sup>                 | 907.1              | 3.74 |
| v'''               | Ce <sup>4+</sup>                 | 898.0              | 2.09 |
| u'''               | Ce <sup>4+</sup>                 | 916.4              | 2.09 |

**Table S6.** Peak position and full width at half maximum (FWHM) for the fitted 5 sets of spin-orbit split doublets of Ce 3d ( $3d_{5/2}$  and  $3d_{3/2}$ ) for CePrOx (BTC)

| Peak<br>Assignment | Origin of cerium<br>contribution | Peak decomposition |      |
|--------------------|----------------------------------|--------------------|------|
|                    |                                  | Peak               | FWMH |
| v0                 | Ce <sup>3+</sup>                 | 880.5              | 1.5  |
| u0                 | Ce <sup>3+</sup>                 | 898.7              | 1.5  |
| v                  | Ce <sup>4+</sup>                 | 882.0              | 1.9  |
| u                  | Ce <sup>4+</sup>                 | 900.4              | 1.9  |
| v'                 | Ce <sup>3+</sup>                 | 884.0              | 3.9  |
| u'                 | Ce <sup>3+</sup>                 | 902.0              | 3.9  |
| v''                | Ce <sup>4+</sup>                 | 888.4              | 3.5  |
| u''                | Ce <sup>4+</sup>                 | 907.0              | 3.5  |
| v'''               | Ce <sup>4+</sup>                 | 897.8              | 2.2  |
| u'''               | Ce <sup>4+</sup>                 | 916.3              | 2.2  |

**Table S7.** Comparison of direct DMC formation rates from CO<sub>2</sub> and methanol over various catalysts

| Catalysts                                            | DMC Yield<br>( $\mu\text{mol}_{\text{DMC}}/\text{g}_{\text{cat}}\cdot\text{min}$ ) | Reaction Conditions |          | Ref.      |
|------------------------------------------------------|------------------------------------------------------------------------------------|---------------------|----------|-----------|
|                                                      |                                                                                    | Temperature         | Pressure |           |
| CePrOx (BTC)                                         | 5.1                                                                                | 120 °C              | 10 bar   | This work |
| CePrOx (BTC)                                         | 3.2                                                                                | 120 °C              | 5 bar    | This work |
| Ce <sub>0.8</sub> Zr <sub>0.2</sub> O <sub>2</sub>   | 0.9                                                                                | 120 °C              | 18 bar   | 1         |
| Ti <sub>0.04</sub> Ce <sub>0.96</sub> O <sub>2</sub> | 4.5                                                                                | 140 °C              | 10 bar   | 2         |
| CeO <sub>2</sub>                                     | 1.8                                                                                | 140 °C              | 30 bar   | 3         |
| Ce/SBA-15                                            | 0.6                                                                                | 130 °C              | 50 bar   | 4         |
| Y <sub>0.3</sub> Fe <sub>0.5</sub> O <sub>x</sub>    | 2.6                                                                                | 110 °C              | 80 bar   | 5         |
| ZrO <sub>2</sub>                                     | 2.2                                                                                | 160 °C              | 48 bar   | 6         |
| Fe <sub>0.7</sub> Zr <sub>0.3</sub> O <sub>y</sub>   | 1.8                                                                                | 140 °C              | 50 bar   | 7         |

## References

1. H. J. Hofmann, A. Brandner and P. Claus, *Chemical Engineering & Technology*, 2012, **35**, 2140-2146.
2. Z. Fu, Y. Zhong, Y. Yu, L. Long, M. Xiao, D. Han, S. Wang and Y. Meng, *ACS Omega*, 2018, **3**, 198-207.
3. S. Rojas-Buzo, D. Salusso, A. Jouve, E. Bracciotti, M. Signorile and S. Bordiga, *Applied Catalysis B: Environment and Energy*, 2024, **346**, 123723.
4. Y. Pu, K. Xuan, F. Wang, A. Li, N. Zhao and F. Xiao, *RSC Advances*, 2018, **8**, 27216-27226.
5. W. Sun, L. Zheng, Y. Wang, W. Jia, W. Guo, Z. Liu, X. Ding, L. Wu and T. Fang, *Journal of CO<sub>2</sub> Utilization*, 2022, **58**, 101912.
6. T. Akune, Y. Morita, S. Shirakawa, K. Katagiri and K. Inumaru, *Langmuir*, 2018, **34**, 23-29.
7. A. Li, Y. Pu, F. Li, J. Luo, N. Zhao and F. Xiao, *Journal of CO<sub>2</sub> Utilization*, 2017, **19**, 33-39.
